# Supplementary material for: CO2-Stimulated morphology transition of ABC miktoarm star terpolymer assemblies
Source: Royal Society of Chemistry journal article supplement (doi:10.1039/c7py00214a), 2017-01-01
Supplement: c7py00214a1.pdf [file c7py00214a1.pdf]

## Supporting Information

### **CO<sub>2</sub>-stimulated vesicle-to-lamella transition of ABC miktoarm star terpolymer assemblies**

Meng Huo<sup>a,b</sup>, Haotian Du<sup>a</sup>, Min Zeng<sup>a</sup>, Long Pan<sup>c</sup>, Tommy Fang<sup>a</sup>, Xuming Xie<sup>c</sup>, Yen Wei<sup>\*b</sup> and Jinying Yuan<sup>\*a</sup>

<sup>a</sup>Key Lab of Organic Optoelectronics and Molecular Engineering of Ministry of Education, Department of Chemistry, Tsinghua University, Beijing 100084, P. R. China. E-mail: yuanjy@mail.tsinghua.edu.cn

<sup>b</sup>Key Lab of Bioorganic Phosphorus Chemistry & Chemical Biology of Ministry of Education, Department of Chemistry, Tsinghua University, Beijing 100084, P. R. China. E-mail: weiyen@tsinghua.edu.cn

<sup>c</sup>Department of Chemical Engineering, Tsinghua University, Beijing 100084, P. R. China

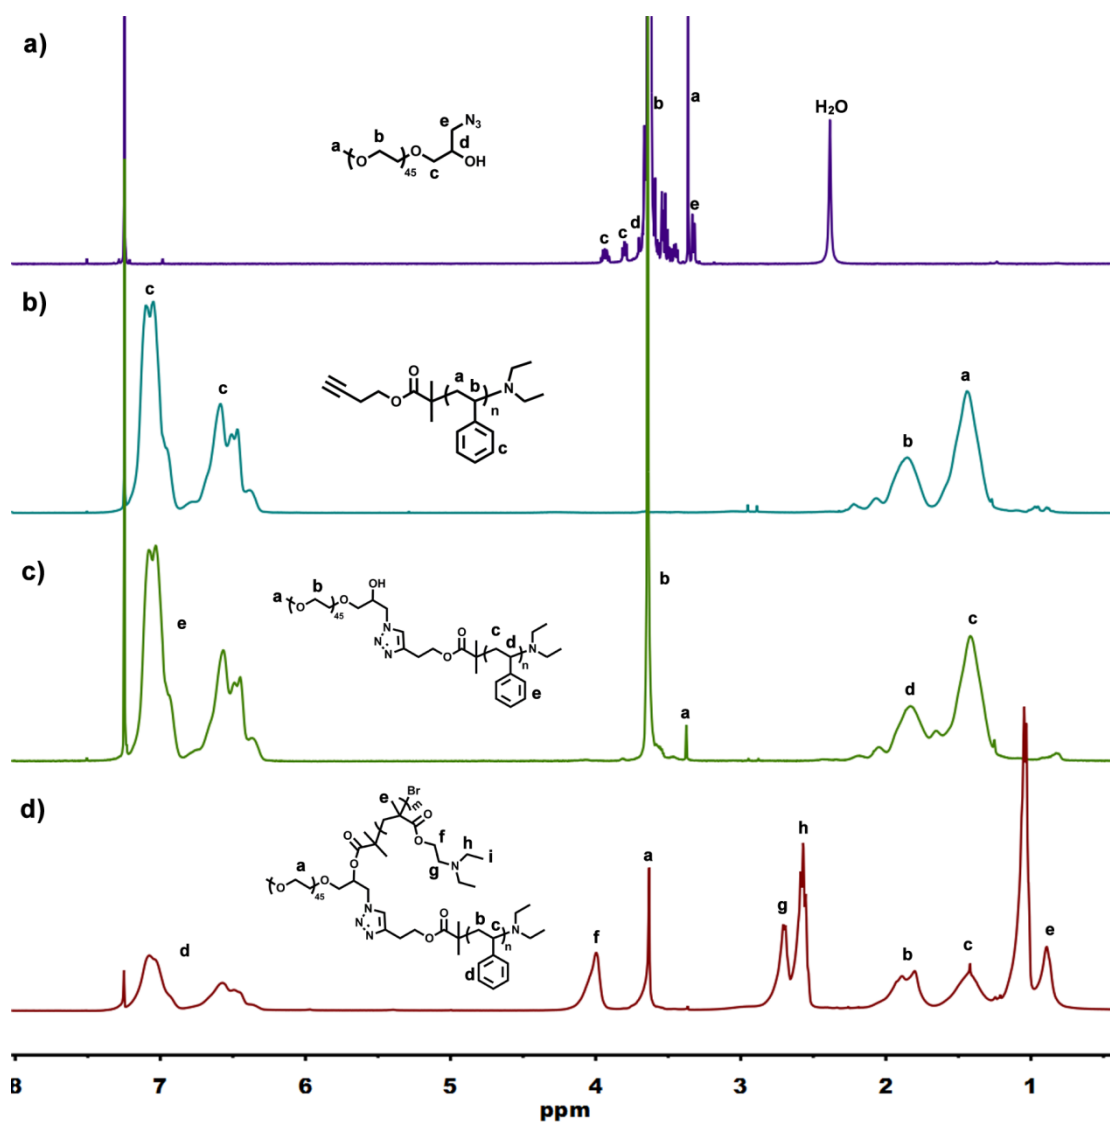

**Fig. S1**  $^1\text{H}$  NMR spectra of a) PEG-(OH)- $\text{N}_3$ , b) PS- $\text{NEt}_2$ , c) PEG-(OH)-PS, d)  $\mu$ -PEG-PS-PDEA<sup>a</sup>.

<sup>a</sup>The DP of PDEA was calculated using the integration of the peak a and peak f in Fig. S1d according to the following equation:

$$\text{DP}_{\text{PDEA}} = \frac{45 \times 4}{2} \times \frac{I_f}{I_a}$$

where  $I_f$  represents the integration of the peak f and  $I_a$  represents the integration of the peak a.

According to the calculation the DPs of PDEA of  $\mu$ -PEG-PS-PDEA were 18 ( $\mu$ -PEG-PS-PDEA<sub>3.3k</sub>), 37 ( $\mu$ -PEG-PS-PDEA<sub>6.8k</sub>), 50 ( $\mu$ -PEG-PS-PDEA<sub>9.3k</sub>), 66 ( $\mu$ -PEG-PS-PDEA<sub>12.2k</sub>), and 135 ( $\mu$ -PEG-PS-PDEA<sub>25.0k</sub>), respectively.

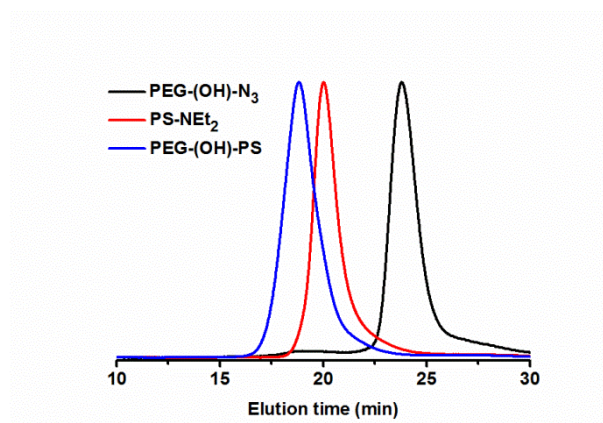

Fig. S2 GPC traces of PEG-(OH)-N<sub>3</sub>, PS-NEt<sub>2</sub> and PEG-(OH)-PS.

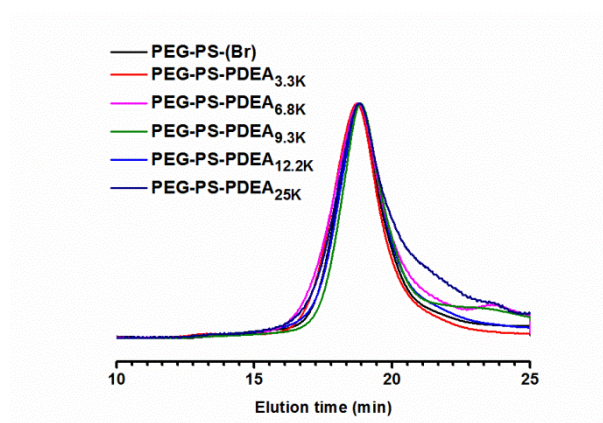

Fig. S3 GPC traces of PEG-(Br)-PS and μ-PEG-PS-PDEA with different PDEA chain lengths.

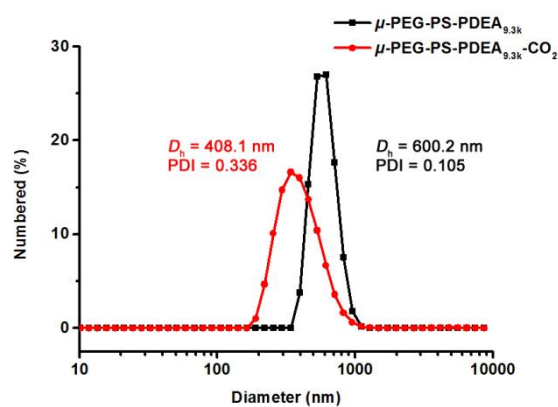

Fig. S4 DLS characterization of μ-PEG-PS-PDEA<sub>9.3k</sub> before and after CO<sub>2</sub> purging.

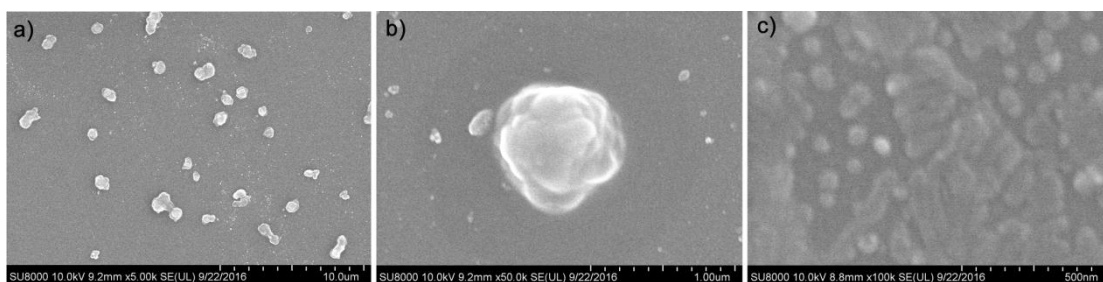

**Fig. S5** SEM characterization of  $\mu$ -PEG-PS-PDEA<sub>9.3k</sub> a), b) before and c) after CO<sub>2</sub> purging.

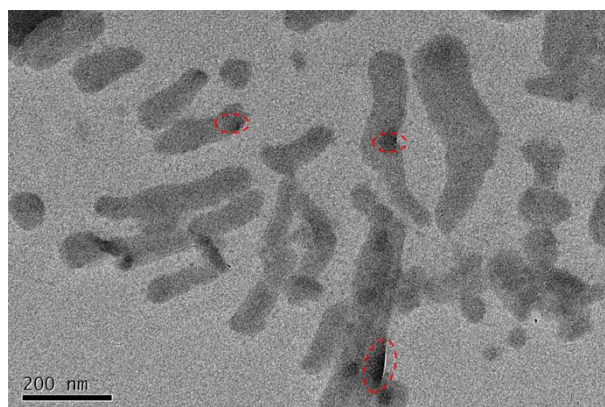

**Fig. S6** TEM images of  $\mu$ -PEG-PS-PDEA<sub>9.3k</sub> assemblies after CO<sub>2</sub> stimulation. No staining agent was used.

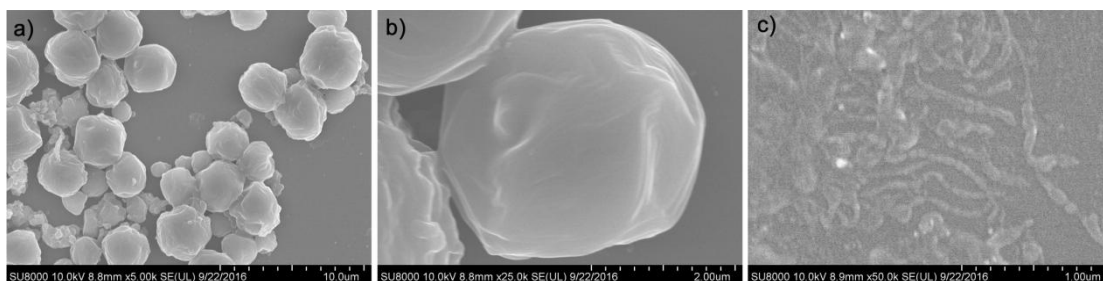

**Fig. S7** SEM characterization of  $\mu$ -PEG-PS-PDEA<sub>12.2k</sub> a), b) before and c) after CO<sub>2</sub> purging.

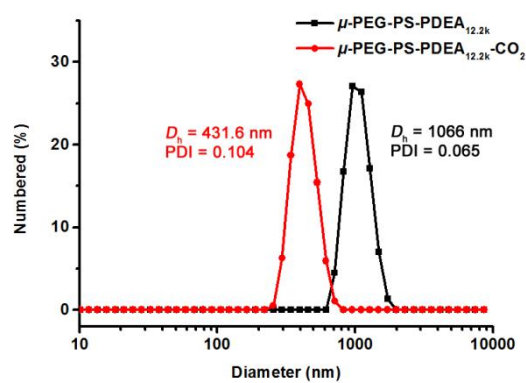

**Fig. S8** DLS characterization of  $\mu$ -PEG-PS-PDEA<sub>12.2k</sub> before and after CO<sub>2</sub> purging.

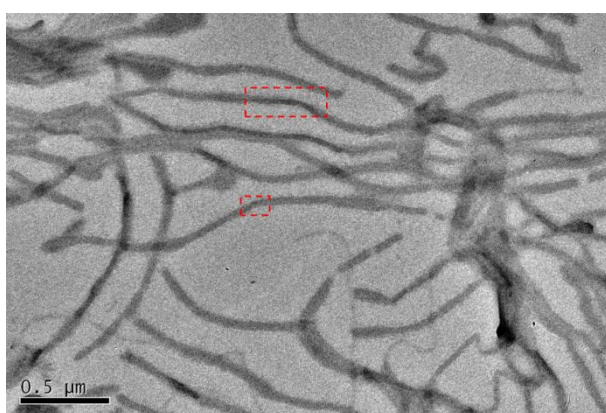

**Fig. S9** TEM images of  $\mu$ -PEG-PS-PDEA<sub>12.2k</sub> assemblies after CO<sub>2</sub> stimulation. No staining agent was used.

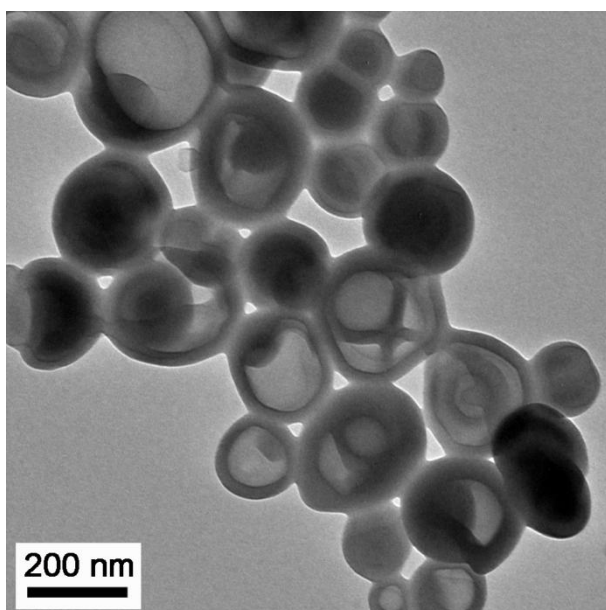

**Fig. S10** Small vesicles were observed in the TEM image of  $\mu$ -PEG-PS-PDEA<sub>25k</sub> assemblies.

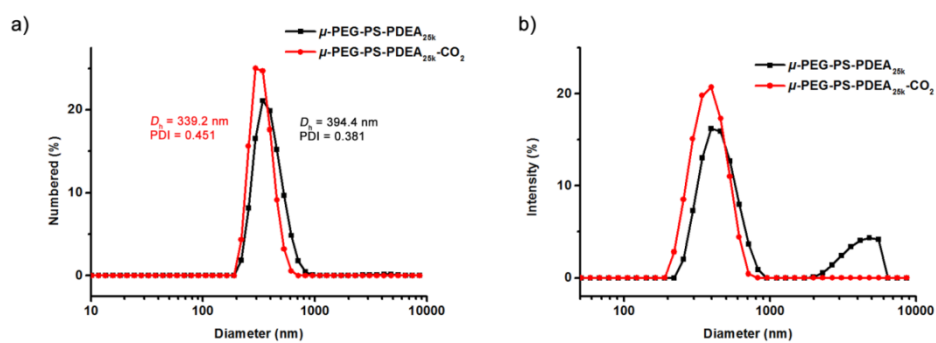

**Fig. S11** DLS characterization of  $\mu$ -PEG-PS-PDEA<sub>25k</sub> before and after CO<sub>2</sub> purging. a) Number-averaged size distribution. b) Intensity-averaged size distribution.

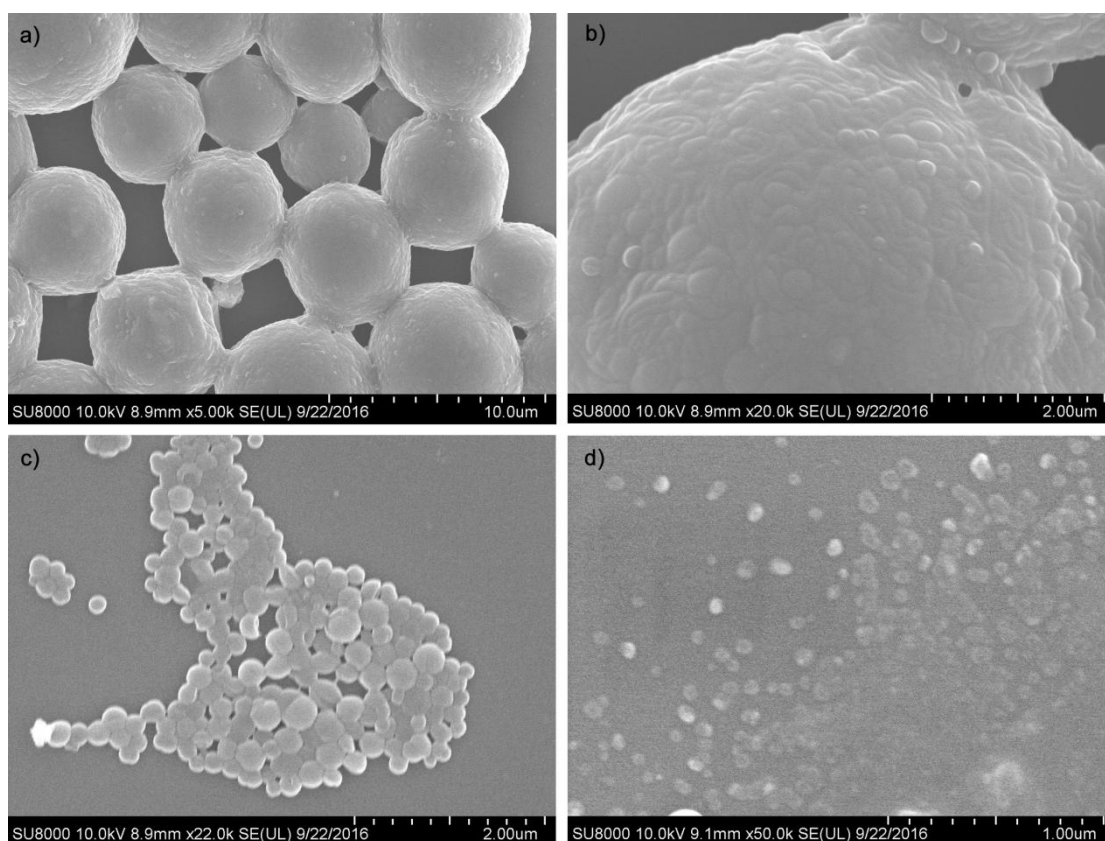

**Fig. S12** SEM characterization of  $\mu$ -PEG-PS-PDEA<sub>25k</sub> a), b), c) before and d) after CO<sub>2</sub> purging.

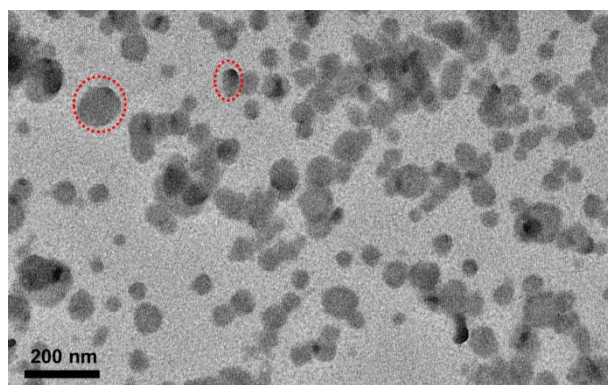

**Fig. S13** TEM images of  $\mu$ -PEG-PS-PDEA<sub>25k</sub> assemblies after CO<sub>2</sub> stimulation. No staining agent was used.

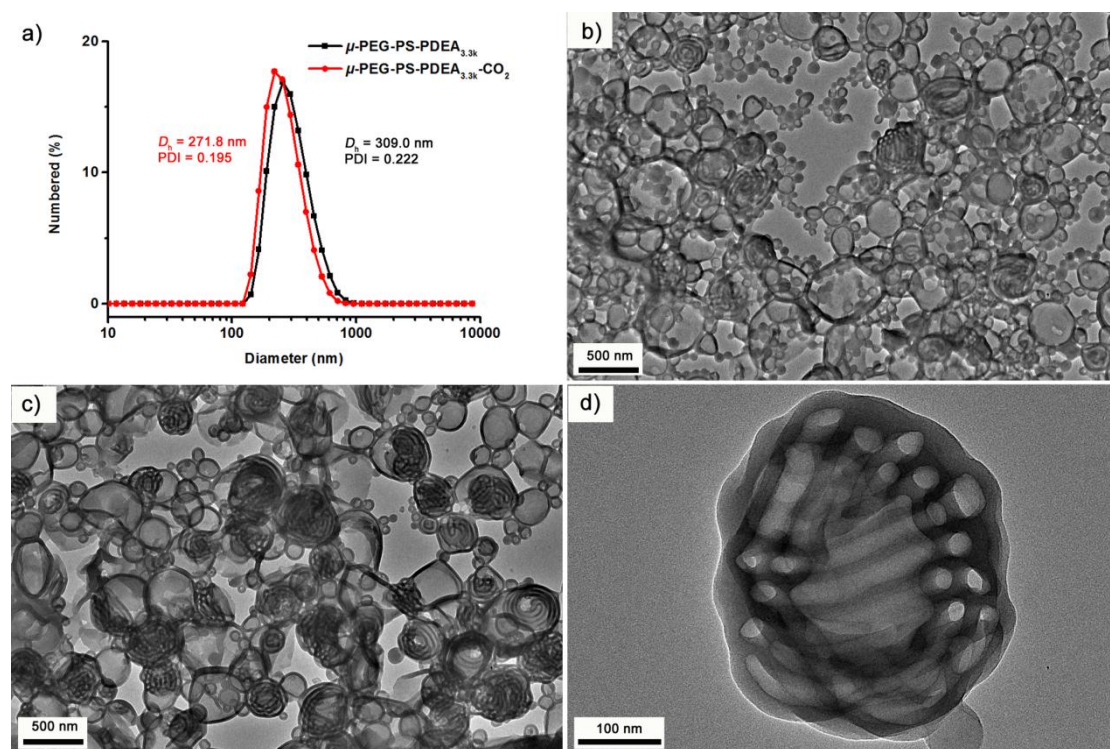

**Fig. S14** a) DLS characterization of  $\mu$ -PEG-PS-PDEA<sub>3.3k</sub> before and after CO<sub>2</sub> purging. TEM characterization of  $\mu$ -PEG-PS-PDEA<sub>3.3k</sub> b) before and c) after CO<sub>2</sub> purging. d) HRTEM image of the HHH structure of  $\mu$ -PEG-PS-PDEA<sub>3.3k</sub> assemblies.

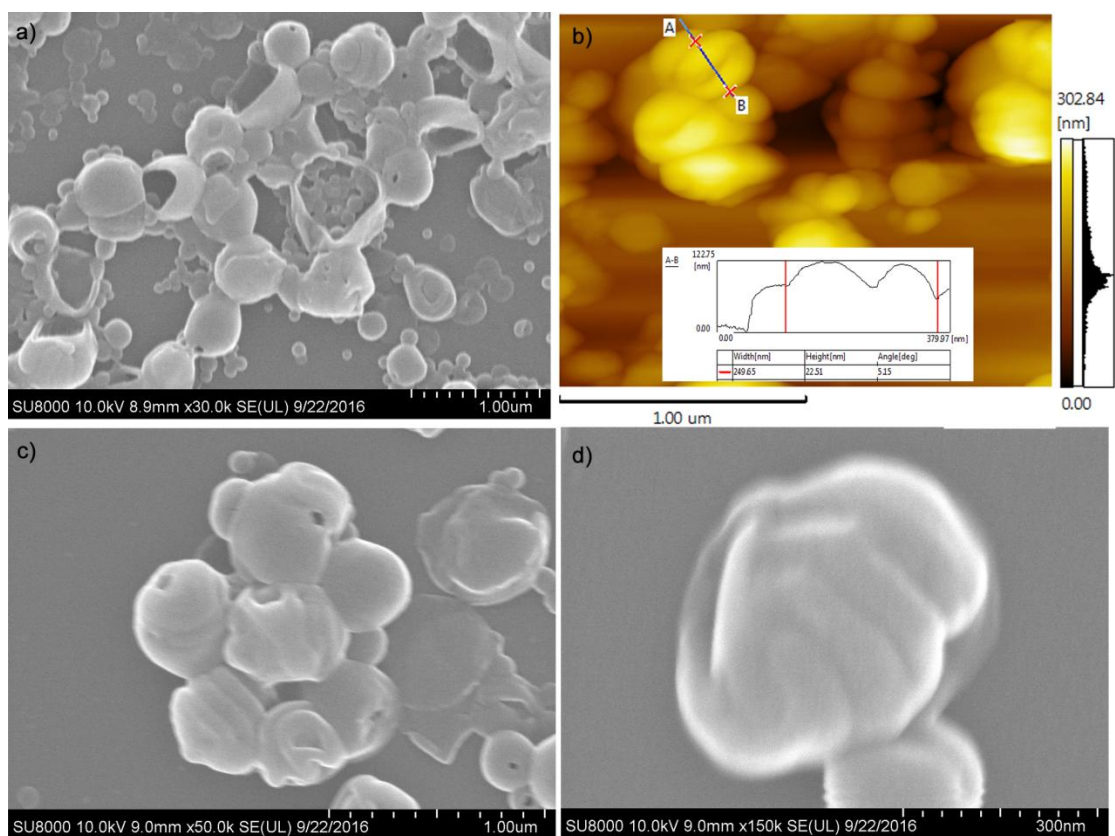

**Fig. S15** a) SEM and b) AFM characterization of  $\mu$ -PEG-PS-PDEA<sub>3.3k</sub> before CO<sub>2</sub> purging. c), d) SEM characterization of  $\mu$ -PEG-PS-PDEA<sub>3.3k</sub> after CO<sub>2</sub> purging.

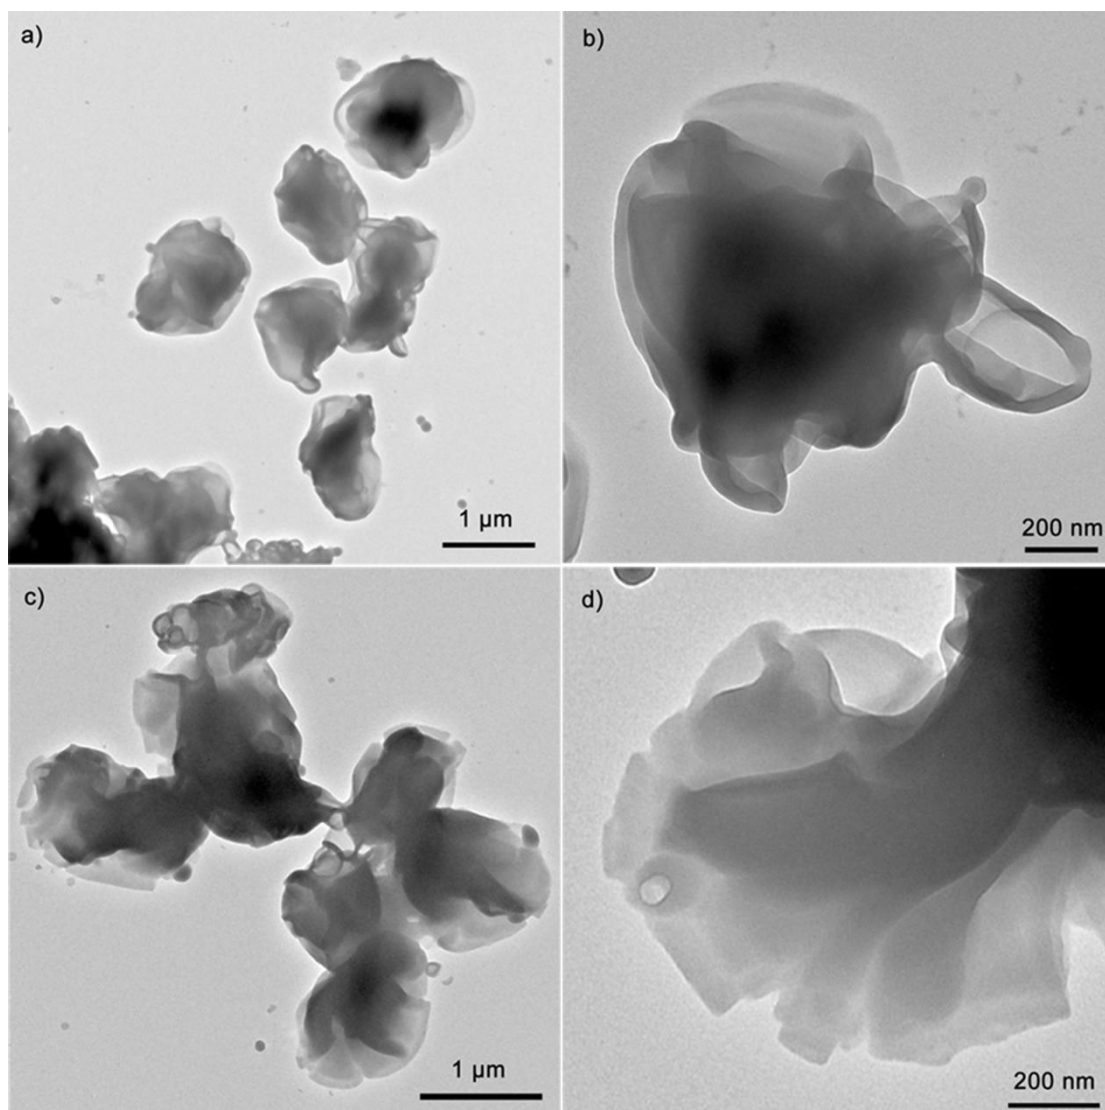

**Fig. S16** TEM characterization of  $\mu$ -PEG-PS-PDEA<sub>6.8k</sub> a), b) before and c), d) after CO<sub>2</sub> purging.

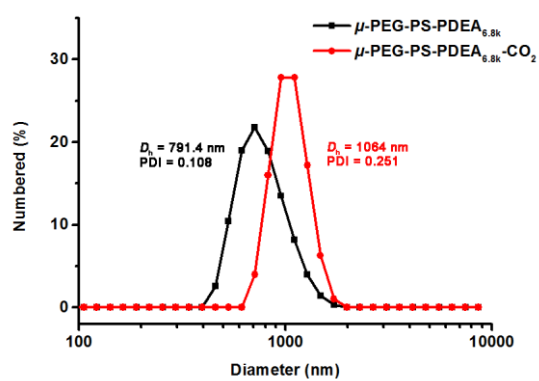

**Fig. S17** DLS characterization of  $\mu$ -PEG-PS-PDEA<sub>6.8k</sub> before and after CO<sub>2</sub> purging.

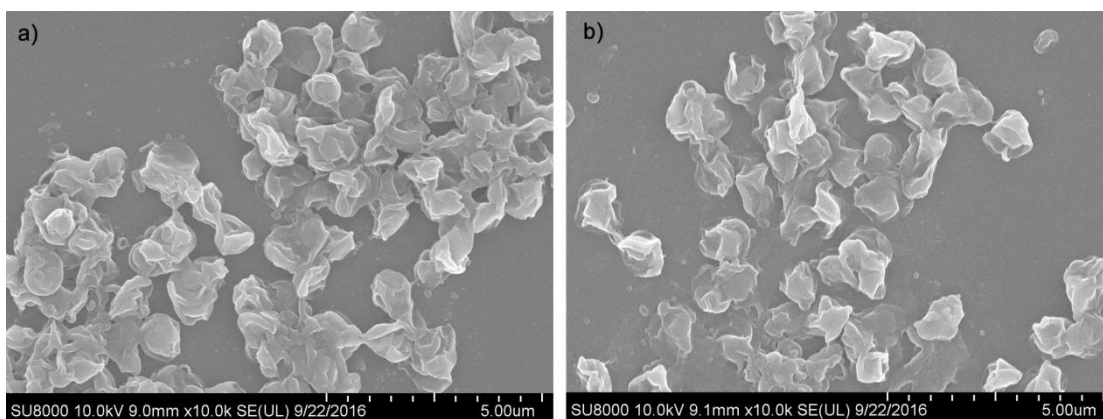

**Fig. S18** SEM characterization of  $\mu$ -PEG-PS-PDEA<sub>6.8k</sub> a) before and b) after CO<sub>2</sub> purging.

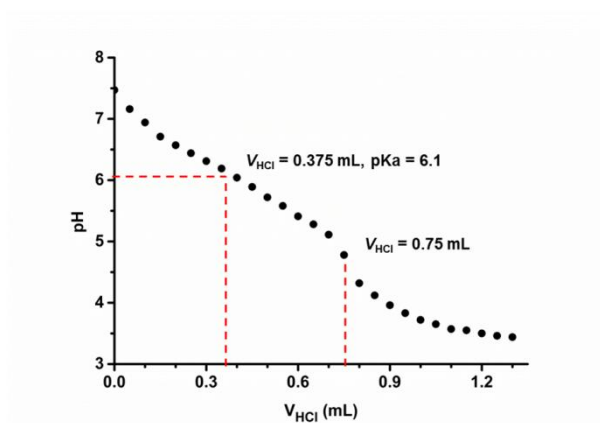

**Fig. S19** pH titration curve of the  $\mu$ -PEG-PS-PDEA<sub>6.8k</sub> star terpolymer.

**Table S1** Zeta potential of  $\mu$ -PEG-PS-PDEA assemblies before and after CO<sub>2</sub> purging.

| Sample                              | Before CO <sub>2</sub><br>purging/mV | After CO <sub>2</sub> purging/mV |
|-------------------------------------|--------------------------------------|----------------------------------|
| $\mu$ -PEG-PS-PDEA <sub>3.3k</sub>  | +45.7                                | +57.8                            |
| $\mu$ -PEG-PS-PDEA <sub>6.8k</sub>  | +22.7                                | +34.9                            |
| $\mu$ -PEG-PS-PDEA <sub>9.3k</sub>  | +36.0                                | +49.4                            |
| $\mu$ -PEG-PS-PDEA <sub>12.2k</sub> | +62.2                                | +61.4 <sup>a</sup>               |
| $\mu$ -PEG-PS-PDEA <sub>25k</sub>   | +51.8                                | +59.7                            |

<sup>a</sup>The zeta potentials were obtained using Malvern Zetasizer Nano ZS90, which measures the electrophoresis mobility and calculates the zeta potential according to the Henry equation ( $U_E = \frac{2\epsilon\zeta}{3\eta} g(\kappa a)$ ), where  $U_E$  is the electrophoretic mobility,  $\epsilon$  is the dielectric constant,  $\zeta$  is the zeta potential,  $\eta$  is the viscosity of the dispersion, and  $g(\kappa a)$  is the Henry coefficient). However, the classic electrokinetic theory that the commercial instrument adopted ignores the influence of the size and shape of colloids to the electrophoretic mobility. In fact, the size and shape of colloids were found to have significant impacts to the test outcome, where colloids with larger sizes were found to have higher electrophoretic mobility.<sup>S1, S2</sup> As for the CO<sub>2</sub>-responsive  $\mu$ -PEG-PS-PDEA<sub>12.2k</sub> assemblies, the size of decreased from 1100 nm

to 400 nm after purging with CO<sub>2</sub>, and their morphology evolved from sphere to nano-ribbon, which accounts for the inconspicuous zeta potential trend observed.

## References

- S1. L. Vorwerk, M. Antonietti and K. Tauer, *Colloids Surf., A*, 1999, **150**, 129–135.
- S2. M. T. Roy, M. Gallardo and J. Estelrich, *J. Colloid Interface Sci.*, 1998, **206**, 512–517.
